# Supplementary material for: Gel-Assisted Proteome Position Integral Shift Assay Returns Molecular Weight to Shotgun Proteomics and Identifies Caspase 3 Substrates
Source: PubMed Central journal article supplement (PMC11339726; doi:10.1021/acs.analchem.4c02051), 2024-08-07
Supplement: ac4c02051_si_001.pdf [file ac4c02051_si_001.pdf]

# Gel-Assisted Proteome Position Integral Shift (GAPPIS) Assay Returns Molecular Weight to Shotgun Proteomics and Identifies Caspase 3 Substrates

## Supporting Information

Zhaowei Meng<sup>1,2,3</sup>, Amir Ata Saei<sup>4</sup>, Hassan Gharibi<sup>1,2,3</sup>, Xuepei Zhang<sup>1,2,3</sup>, Hezheng Lyu<sup>1,5</sup>, Susanna L. Lundström<sup>1,2,3</sup>, Ákos Végvári<sup>1</sup>, Massimiliano Gaetani<sup>1,2,3</sup>, Roman A. Zubarev<sup>1,3,6-8\*</sup>

<sup>1</sup>Division of Chemistry I, Department of Medical Biochemistry and Biophysics, Karolinska Institutet, 17177, Stockholm, Sweden

<sup>2</sup>Chemical Proteomics Unit, Science for Life Laboratory (SciLifeLab), 17165, Stockholm, Sweden

<sup>3</sup>Chemical Proteomics, Swedish National Infrastructure for Biological Mass Spectrometry (BioMS), 17177, Stockholm, Sweden

<sup>4</sup>Department of Microbiology, Tumor and Cell Biology, Karolinska Institutet, 17177, Stockholm, Sweden

<sup>5</sup>HDXperts AB, 18212, Danderyd, Sweden

<sup>6</sup>The National Medical Research Center for Endocrinology, 115478 Moscow, Russia

<sup>7</sup>Department of Pharmacological & Technological Chemistry, I.M. Sechenov First Moscow State Medical University, 119048, Moscow, Russia

<sup>8</sup>Department of Pharmaceutical and Toxicological Chemistry, RUDN University, 6 Miklukho-Maklaya St, Moscow, 117198, Russia

### Table of Contents

Supplementary Figures S1-S7 (page S2-S8)

Supplementary Table S1 (page S9-S11)

Methods (page S12-S16)

Cell Work and GAPPIS Sample Preparation (page S12-S13)

LC-MS/MS (page S14-S15)

Data Processing (page S15-S16)

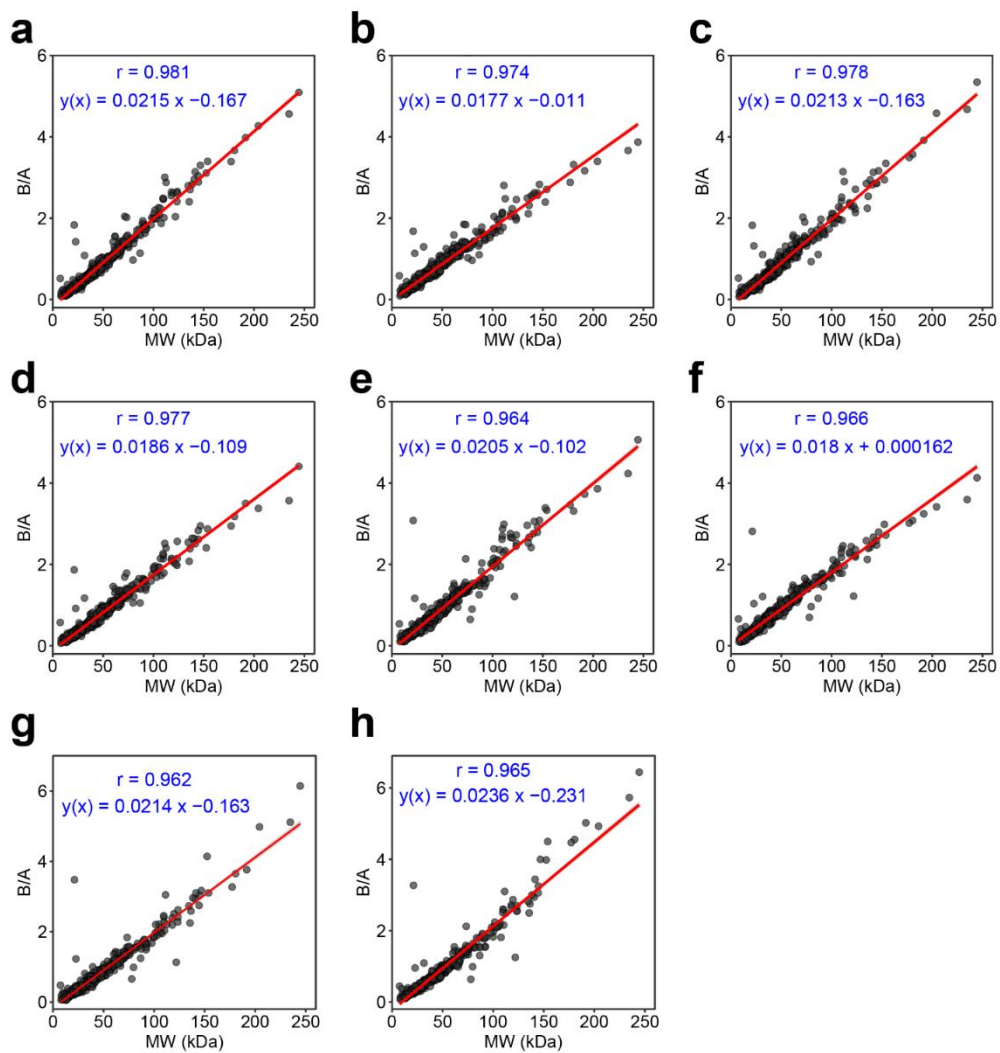

**Figure S1.** Calibration curves converting B/A values to MW for the MS3 data set. (a) to (d) Data calibration curves for the four replicates of DMSO-treated HeLa cells, respectively. (e) to (h) Data calibration curves for the four replicates of STS-treated HeLa cells, respectively.

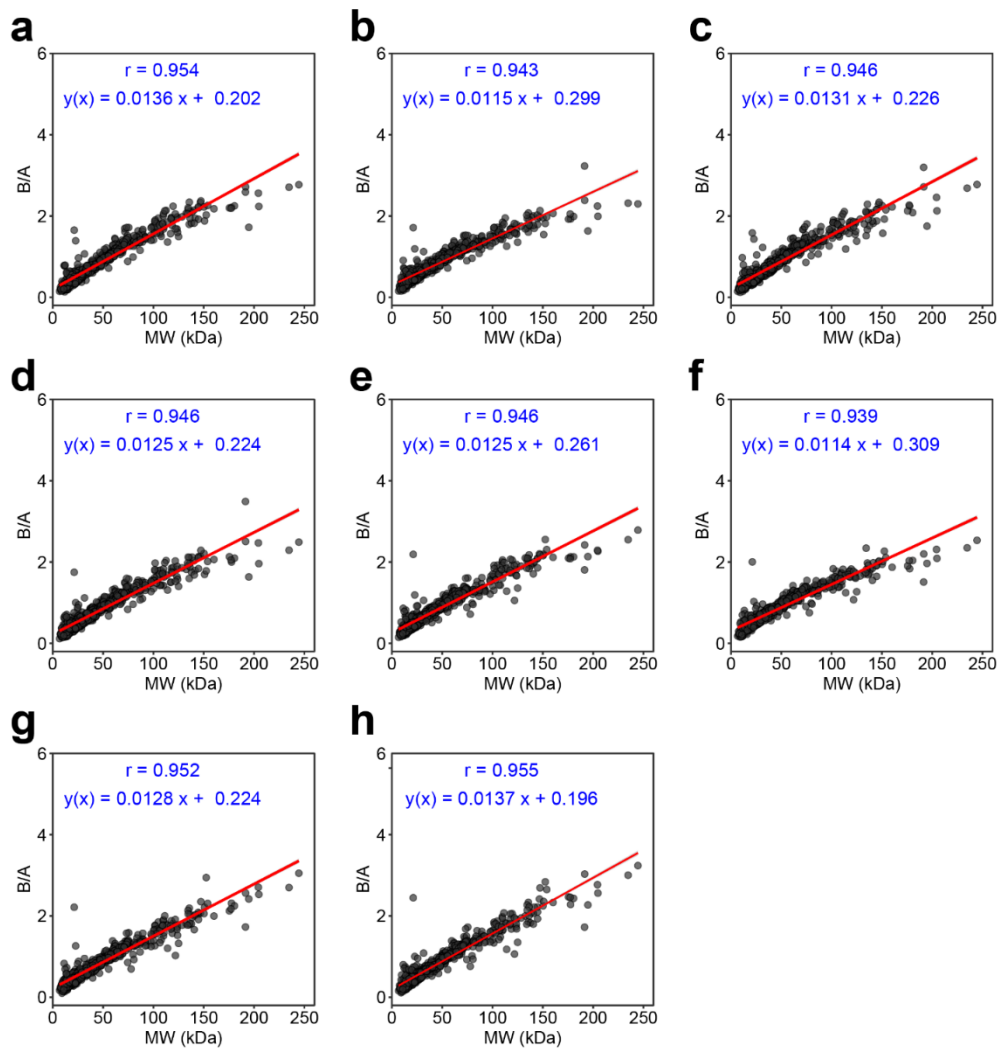

**Figure S2.** Calibration curves converting B/A values to MW for the MS2 data set. (a) to (d) Data calibration curves for the four replicates of DMSO-treated HeLa cells, respectively. (e) to (h) Data calibration curves for the four replicates of STS-treated HeLa cells, respectively.

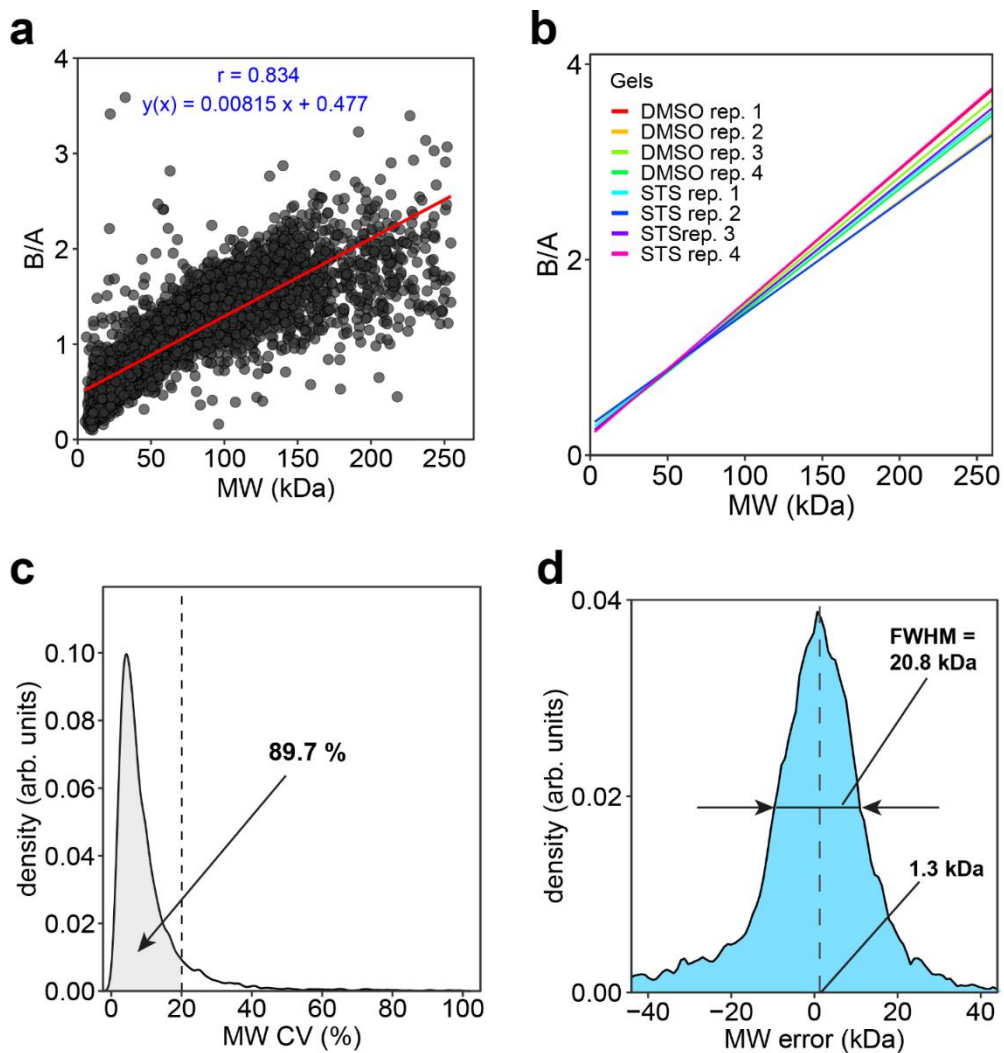

**Figure S3.** Protein MW estimations from peptide B/A ratios for the MS2 data set. (a) Correlation of B/A ratios with MW for all 7433 proteins. (b) Calibration curves for all eight gels. (c) CV distribution of B/A-calculated protein MW values. (d) Error distribution of B/A-calculated protein MW values.

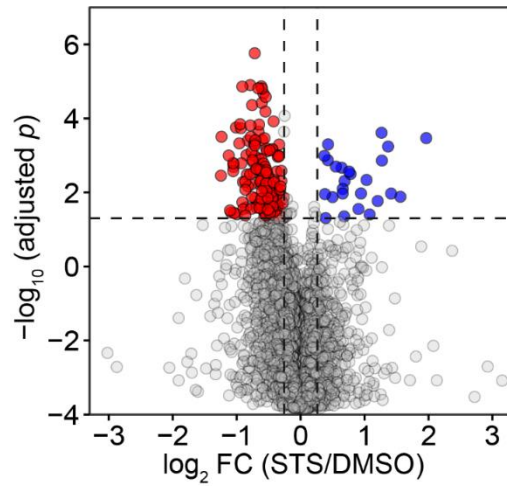

**Figure S4.** Volcano plot of proteins with significant MW shifts in the MS2 data set. With p values adjusted by peptides number-based multiple hypothesis correction, volcano plot shows 155 proteins significantly shift to lower MW (red) while 25 proteins significantly shift to higher MW (blue).

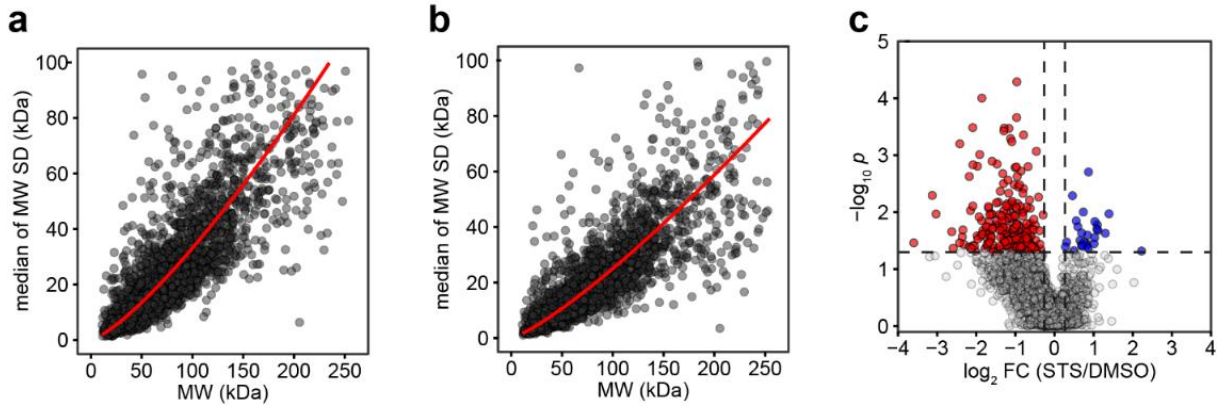

**Figure S5.** Standard deviation (SD) analysis for identifying caspase substrate candidates. (a) The empirical formula  $SD = 0.086MW^{1.29}$  is fitted to the SD-MW plot for DMSO-treatment, with residual standard error of 13 kDa. (b) The empirical formula  $SD = 0.086MW^{1.23}$  is fitted to the SD-MW plot with residual standard error 10 kDa for STS-treatment. (c) Volcano plot for 3384 proteins with  $\geq 7$  peptides from STS-treated HeLa cells with proteins showing significantly decreased (red) and increased (blue) SD.

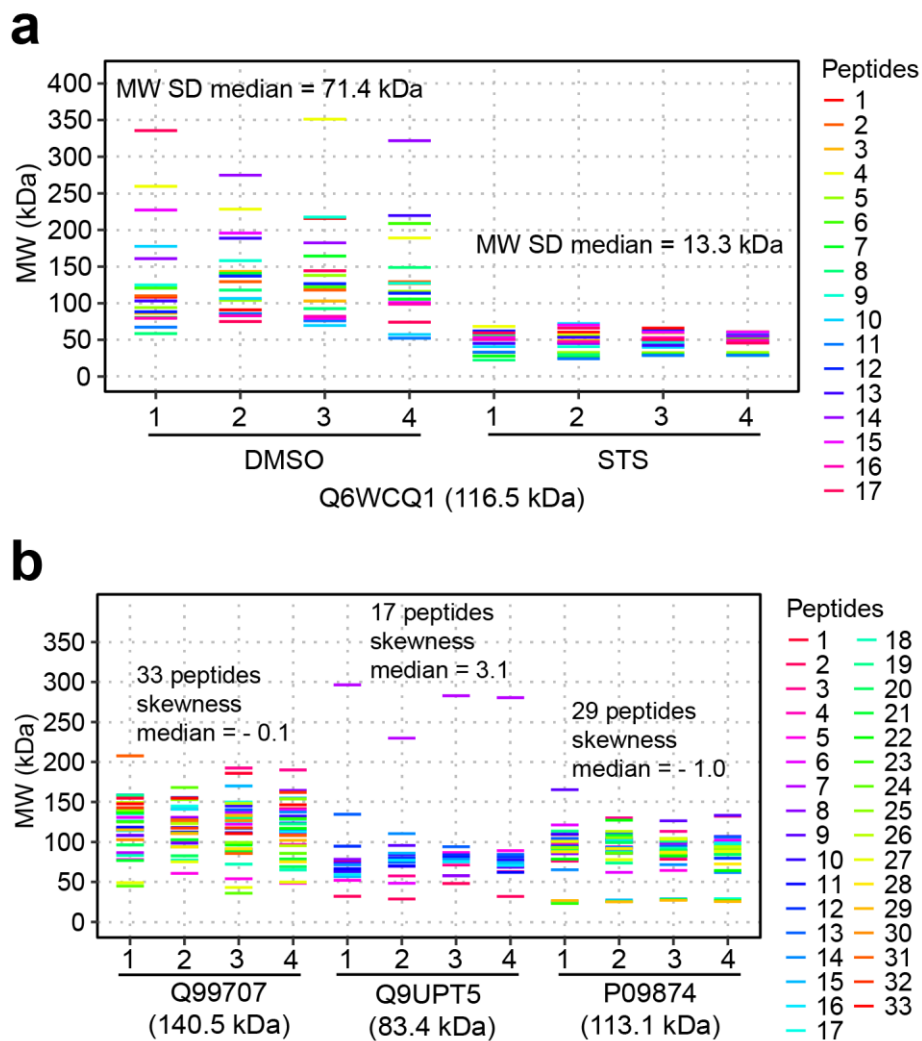

**Figure S6.** Protein MW estimation from peptide B/A values for SD and skewness analysis. (a) A pseudogel with one protein's MW distribution across the four replicates in DMSO- and STS-treated HeLa cells. (b) A pseudogel with peptide-derived MW estimations of three proteins in STS-treated HeLa cells.

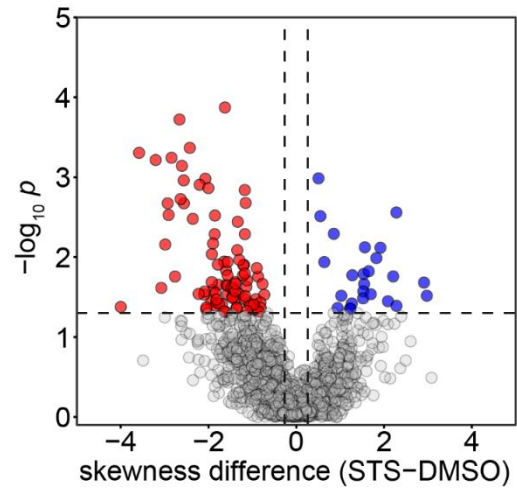

**Figure S7.** Skewness analysis for identifying caspase substrate candidates. Volcano plot for 1569 proteins with  $\geq 13$  peptides showing in STS-treated HeLa cells proteins with significantly decreased (red) and increased (blue) skewness.



**Table S1.** Validated caspase 3 candidate substrates. The proteins at No. 1 to 26 were found in literature. The 58 novel caspase 3 substrates were at No. 27 to 84.

| No. | Protein ID | Gene names | Protein names                                                                                 | MW (kDa) |
|-----|------------|------------|-----------------------------------------------------------------------------------------------|----------|
| 1   | O15027     | SEC16A     | Protein transport protein Sec16A                                                              | 251.89   |
| 2   | O15042     | U2SURP     | U2 snRNP-associated SURP motif-containing protein                                             | 118.29   |
| 3   | O43432     | EIF4G3     | Eukaryotic translation initiation factor 4 gamma 3                                            | 176.65   |
| 4   | O60264     | SMARCA5    | SWI/SNF-related matrix-associated actin-dependent regulator of chromatin subfamily A member 5 | 121.90   |
| 5   | O60271     | SPAG9      | C-Jun-amino-terminal kinase-interacting protein 4                                             | 146.20   |
| 6   | P05783     | KRT18      | Keratin, type I cytoskeletal 18                                                               | 48.06    |
| 7   | P08670     | VIM        | Vimentin                                                                                      | 53.65    |
| 8   | P09874     | PARP1      | Poly [ADP-ribose] polymerase 1                                                                | 113.08   |
| 9   | P20700     | LMNB1      | Lamin-B1                                                                                      | 66.41    |
| 10  | P41214     | EIF2D      | Eukaryotic translation initiation factor 2D                                                   | 64.71    |
| 11  | P42166     | TMPO       | Lamina-associated polypeptide 2, isoform alpha;Thymopoietin;Thymopentin                       | 75.49    |
| 12  | P43243     | MATR3      | Matrin-3                                                                                      | 94.62    |
| 13  | P49321     | NASP       | Nuclear autoantigenic sperm protein                                                           | 85.24    |
| 14  | P51532     | SMARCA4    | Transcription activator BRG1                                                                  | 184.64   |
| 15  | P78344     | EIF4G2     | Eukaryotic translation initiation factor 4 gamma 2                                            | 102.36   |
| 16  | Q13177     | PAK2       | Serine/threonine-protein kinase PAK 2;PAK-2p27;PAK-2p34                                       | 58.04    |
| 17  | Q14980     | NUMA1      | Nuclear mitotic apparatus protein 1                                                           | 238.26   |
| 18  | Q14C86     | GAPVD1     | GTPase-activating protein and VPS9 domain-containing protein 1                                | 164.98   |
| 19  | Q2NL82     | TSR1       | Pre-rRNA-processing protein TSR1 homolog                                                      | 91.81    |
| 20  | Q5SW79     | CEP170     | Centrosomal protein of 170 kDa                                                                | 175.29   |
| 21  | Q5T200     | ZC3H13     | Zinc finger CCCH domain-containing protein 13                                                 | 196.63   |
| 22  | Q6PKG0     | LARP1      | La-related protein 1                                                                          | 123.51   |
| 23  | Q92538     | GBF1       | Golgi-specific brefeldin A-resistance guanine nucleotide exchange factor 1                    | 206.44   |
| 24  | Q9BTE3     | MCMBP      | Mini-chromosome maintenance complex-binding protein                                           | 72.98    |
| 25  | Q9C0C9     | UBE2O      | E2/E3 hybrid ubiquitin-protein ligase UBE2O                                                   | 141.29   |
| 26  | Q9UPT8     | ZC3H4      | Zinc finger CCCH domain-containing protein 4                                                  | 140.26   |
| 27  | A1X283     | SH3PXD2B   | SH3 and PX domain-containing protein 2B                                                       | 101.58   |
| 28  | O15031     | PLXNB2     | Plexin-B2                                                                                     | 205.12   |
| 29  | O60256     | PRPSAP2    | Phosphoribosyl pyrophosphate synthase-associated protein 2                                    | 40.93    |
| 30  | O60333     | KIF1B      | Kinesin-like protein KIF1B                                                                    | 204.47   |

| No. | Protein ID | Gene names | Protein names                                                                                                       | MW (kDa) |
|-----|------------|------------|---------------------------------------------------------------------------------------------------------------------|----------|
| 31  | O60524     | NEMF       | Nuclear export mediator factor NEMF                                                                                 | 122.95   |
| 32  | O75970     | MPDZ       | Multiple PDZ domain protein                                                                                         | 221.62   |
| 33  | O95197     | RTN3       | Reticulon-3                                                                                                         | 112.61   |
| 34  | P04843     | RPN1       | Dolichyl-diphosphooligosaccharide--protein glycosyltransferase subunit 1                                            | 68.57    |
| 35  | P08237     | PFKM       | ATP-dependent 6-phosphofructokinase, muscle type                                                                    | 85.18    |
| 36  | P25705     | ATP5A1     | ATP synthase subunit alpha, mitochondrial                                                                           | 59.75    |
| 37  | P26358     | DNMT1      | DNA (cytosine-5)-methyltransferase 1                                                                                | 183.16   |
| 38  | P27708     | CAD        | CAD protein;Glutamine-dependent carbamoyl-phosphate synthase;Aspartate carbamoyltransferase;Dihydroorotase          | 242.98   |
| 39  | P30876     | POLR2B     | DNA-directed RNA polymerase II subunit RPB2                                                                         | 133.90   |
| 40  | P31751     | AKT2       | RAC-beta serine/threonine-protein kinase                                                                            | 55.77    |
| 41  | P46087     | NOP2       | Probable 28S rRNA (cytosine(4447)-C(5))-methyltransferase                                                           | 89.30    |
| 42  | P51114     | FXR1       | Fragile X mental retardation syndrome-related protein 1                                                             | 69.72    |
| 43  | P51858     | HDGF       | Hepatoma-derived growth factor                                                                                      | 26.79    |
| 44  | Q02952     | AKAP12     | A-kinase anchor protein 12                                                                                          | 191.48   |
| 45  | Q05209     | PTPN12     | Tyrosine-protein phosphatase non-receptor type 12                                                                   | 88.11    |
| 46  | Q08AD1     | CAMSAP2    | Calmodulin-regulated spectrin-associated protein 2                                                                  | 168.09   |
| 47  | Q12904     | AIMP1      | Aminoacyl tRNA synthase complex-interacting multifunctional protein 1;Endothelial monocyte-activating polypeptide 2 | 34.35    |
| 48  | Q13905     | RAPGEF1    | Rap guanine nucleotide exchange factor 1                                                                            | 120.55   |
| 49  | Q14126     | DSG2       | Desmoglein-2                                                                                                        | 122.29   |
| 50  | Q14160     | SCRIB      | Protein scribble homolog                                                                                            | 174.91   |
| 51  | Q14669     | TRIP12     | E3 ubiquitin-protein ligase TRIP12                                                                                  | 220.43   |
| 52  | Q14692     | BMS1       | Ribosome biogenesis protein BMS1 homolog                                                                            | 145.81   |
| 53  | Q5JSH3     | WDR44      | WD repeat-containing protein 44                                                                                     | 101.37   |
| 54  | Q5JSZ5     | PRRC2B     | Protein PRRC2B                                                                                                      | 242.96   |
| 55  | Q5T5Y3     | CAMSAP1    | Calmodulin-regulated spectrin-associated protein 1                                                                  | 177.97   |
| 56  | Q5TAX3     | ZCCHC11    | Terminal uridylyltransferase 4                                                                                      | 185.16   |
| 57  | Q5VT25     | CDC42BPA   | Serine/threonine-protein kinase MRCK alpha                                                                          | 197.30   |
| 58  | Q641Q2     | FAM21A     | WASH complex subunit FAM21A                                                                                         | 147.18   |
| 59  | Q68E01     | INTS3      | Integrator complex subunit 3                                                                                        | 118.07   |
| 60  | Q6WCQ1     | MPRIP      | Myosin phosphatase Rho-interacting protein                                                                          | 116.53   |
| 61  | Q6XZF7     | DNMBP      | Dynamin-binding protein                                                                                             | 177.35   |
| 62  | Q7RTP6     | MICAL3     | Protein-methionine sulfoxide oxidase MICAL3                                                                         | 224.29   |
| 63  | Q7Z3T8     | ZFYVE16    | Zinc finger FYVE domain-containing protein 16                                                                       | 168.90   |

| No. | Protein ID | Gene names | Protein names                                                      | MW (kDa) |
|-----|------------|------------|--------------------------------------------------------------------|----------|
| 64  | Q7Z4S6     | KIF21A     | Kinesin-like protein KIF21A                                        | 187.18   |
| 65  | Q8N3D4     | EHBP1L1    | EH domain-binding protein 1-like protein 1                         | 161.85   |
| 66  | Q8NEB9     | PIK3C3     | Phosphatidylinositol 3-kinase catalytic subunit type 3             | 101.55   |
| 67  | Q8WWI1     | LMO7       | LIM domain only protein 7                                          | 192.69   |
| 68  | Q92576     | PHF3       | PHD finger protein 3                                               | 229.48   |
| 69  | Q96BP3     | PPWD1      | Peptidylprolyl isomerase domain and WD repeat-containing protein 1 | 73.57    |
| 70  | Q96PC5     | MIA2       | Melanoma inhibitory activity protein 2                             | 159.83   |
| 71  | Q9BQG0     | MYBBP1A    | Myb-binding protein 1A                                             | 148.85   |
| 72  | Q9BSJ8     | ESYT1      | Extended synaptotagmin-1                                           | 122.85   |
| 73  | Q9C0B5     | ZDHHC5     | Palmitoyltransferase ZDHHC5                                        | 77.54    |
| 74  | Q9H501     | ESF1       | ESF1 homolog                                                       | 98.80    |
| 75  | Q9NR30     | DDX21      | Nucleolar RNA helicase 2                                           | 87.34    |
| 76  | Q9NS87     | KIF15      | Kinesin-like protein KIF15                                         | 160.16   |
| 77  | Q9NSE4     | IARS2      | Isoleucine--tRNA ligase, mitochondrial                             | 113.79   |
| 78  | Q9NTI5     | PDS5B      | Sister chromatid cohesion protein PDS5 homolog B                   | 164.67   |
| 79  | Q9NUY8     | TBC1D23    | TBC1 domain family member 23                                       | 78.32    |
| 80  | Q9UPN4     | CEP131     | Centrosomal protein of 131 kDa                                     | 122.15   |
| 81  | Q9UPQ0     | LIMCH1     | LIM and calponin homology domains-containing protein 1             | 121.87   |
| 82  | Q9UQE7     | SMC3       | Structural maintenance of chromosomes protein 3                    | 141.54   |
| 83  | Q9Y2D5     | AKAP2      | A-kinase anchor protein 2                                          | 94.66    |
| 84  | Q9Y4W2     | LAS1L      | Ribosomal biogenesis protein LAS1L                                 | 83.06    |

## METHODS

### Cell Work and GAPPIS Sample Preparation

**Cell culture.** Human HeLa cells (ATCC) were grown at 37°C in 5% CO<sub>2</sub> using Dulbecco's Modified Eagle Medium (Lonza, USA) supplemented with 10% FBS superior (Biochrom) and 100 units/mL penicillin/streptomycin (Gibco). Low-number passages (<10) were used for the experiments.

**Staurosporine Treatment and Cell Lysis.** HeLa cells were cultured in 75 cm<sup>2</sup> flasks for 20 h, subsequently treated with 300 nM staurosporine (STS) or vehicle (DMSO) for 4 h in four biological replicates. Cells were washed twice with phosphate buffered saline (PBS) and lysed in M-PER Mammalian Protein Extraction Reagent (Thermo Fisher) supplemented with 1% protease inhibitors (Roche). The cellular lysates were centrifuged at 12,000 rpm for 10 min at 4°C and the soluble fraction was collected. The protein concentration in the lysate was measured using Pierce BCA kit (Thermo Fisher).

**SDS-PAGE and Gel Excision.** Cell lysate was diluted using M-PER Mammalian Protein Extraction Reagent for all samples to the same protein concentration. The electrophoresis was performed on NuPAGE 4-12% Bis-Tris Mini Protein Gel (Thermo Fisher) with two wells in MES Running Buffer under reduced conditions at 150 V for 60 min using the XCell SureLock system (Thermo Fisher). 100 µg of protein were loaded onto the gel for each sample. One STS-treated sample and one DMSO-treated sample were processed in the same tank. Novex Sharp Pre-Stained Protein Standard (Thermo Fisher) was used as a ladder. After electrophoresis the gels were washed and excised diagonally into two parts (A and B), after which each part of the gel was cut into 1 × 1 mm cubes and transferred into 5 mL LoBind tubes. The gel cubes were centrifuged, followed by sequential washes with ammonium bicarbonate/acetonitrile (1:1, v/v) and acetonitrile, each for 10 min. During the acetonitrile incubation, the gel pieces exhibited shrinkage and opacity. Subsequently, all liquid was removed.

**Reduction and Alkylation.** 25 mM of dithiothreitol (DTT) (Sigma-Aldrich) in 50 mM ammonium bicarbonate was added to fully immerse gel pieces. The samples were then incubated at 56 °C for 30 min. After cooling to room temperature (RT), any remaining liquid was removed. Following this, acetonitrile was added and incubated for 10 min at RT, after which all liquid was removed. Subsequently, 50 mM iodoacetamide (IAA) (Sigma-Aldrich) was

added, and the samples were incubated at RT in darkness for 1 h. Then acetonitrile was used to shrink the gel pieces for 10 min with subsequent liquid removal.

**Trypsin Digestion.** Each sample was rehydrated at 4 °C for 30 min by adding the same volume of 10 ng/μL trypsin in 50 mM ammonium bicarbonate containing 0.01% ProteaseMAX Surfactant (Promega). During rehydration, the absorbance of the solution was checked, and additional trypsin solution was added to ensure that gel pieces immersed completely. Subsequent incubation was performed for 2 h at 37°C with agitation at 200 rpm. Condensate from the tube walls was collected by centrifugation at 12000 × g for 10 s. The digestion solution with extracted peptides was transferred into new 2 mL tubes, and trypsin was inactivated by adding trifluoroacetic acid (TFA) (Sigma-Aldrich) to a final concentration of 0.5%.

**TMT-labeling.** Samples were cleaned up using Sep-Pak cartridges (Waters) and dried in a DNA 120 SpeedVac Concentrator (Thermo Fisher). The dried peptide samples were reconstituted in 50 mM EPPS buffer (pH 8.5). Acetonitrile (ACN) was added to achieve a final concentration of 30%. After cutting each gel lane into two pieces A and B, four replicates of DMSO- and STS-treated HeLa cells (eight samples) produced 16 sub-samples, one set of TMTpro 16plex was used for labeling these 16 sub-samples as shown in Figure 1g. TMTpro 16plex reagents (Thermo Fisher) were added at a 5:1 w/w ratio to each sample, followed by a 2 h-incubation at RT. The TMT labeling reaction was quenched by the addition of 0.5% hydroxylamine. All 16 TMT-labelled samples were combined, acidified with TFA, subjected to clean-up using Sep-Pak cartridges (Waters), and dried in a DNA 120 SpeedVac Concentrator (Thermo Fisher).

**High-pH Fractionation.** Peptide separation for deeper proteome analysis was carried out using an Ultimate 3000 HPLC system (Thermo Fisher) equipped with a Xbridge Peptide BEH C18 column (25 cm × 2.1 mm, particle size 3.5 μm, pore size 300 Å; Waters) operating at a flow rate of 200 μL/min. Fractionation was achieved through a binary solvent system comprising 20 mM NH<sub>4</sub>OH in H<sub>2</sub>O at pH 10 (solvent A) and 20 mM NH<sub>4</sub>OH in acetonitrile (solvent B). The elution profile was programmed as follows (data for % of solvent B): an initial gradient from 2% to 23% over 42 min, followed by a rapid increase to 52% within 4 min, further elevation to 63% in 2 min, and a subsequent isocratic hold at 63% for 5 min. The elution process was monitored by UV absorbance at 214 nm. A total of 96 fractions, each containing a 100 μL aliquot, were collected. Fractions were subsequently combined in a sequential order (e.g. 1, 25, 49, 73), providing a total of 24 composite fractions.

## LC-MS/MS Analysis

The 24 composite fractions were analyzed by LC-MS/MS using an Orbitrap Fusion Lumos mass spectrometer equipped with an EASY Spray Source and connected to an Ultimate 3000 RSLC nano UPLC system (all - Thermo Fisher). Injected sample fractions were pre-concentrated and further desalted online using a PepMap C18 nano trap column (2 cm × 75 μm; particle size, 3 μm; pore size, 100 Å; Thermo Fisher) with a flow rate of 3.5 μL/min for 6 min. Peptide separation was performed using an EASY-Spray C18 reversed-phase nano LC column (Acclaim Pep-Map RSLC; 50 cm × 75 μm; particle size, 2 μm; pore size, 100 Å; Thermo Fisher) at 55°C and a flow rate of 300 nL/min. Peptides were separated using a binary solvent system consisting of 0.1% (v/v) formic acid (FA), 2% (v/v) acetonitrile (ACN) (solvent A) and 98% ACN (v/v), 0.1% (v/v) FA (solvent B) with a gradient of 3–28% B in 115 min, 28–40% B in 5 min, 40–95% B in 5 min. Subsequently, the analytical column was washed with 95% B for 5 min before re-equilibration with 4% B.

To identify and quantify TMT-labelled peptides, we utilized both the MS2 and SPS MS3 methods. In the MS2 approach, a full MS (MS1) spectrum was first acquired in the Orbitrap analyzer with mass-to-charge ratio (m/z) range from 375 to 1500, nominal resolution 120,000, automated gain control (AGC) target  $4 \times 10^5$ , and maximum injection time of 50 ms. The most abundant peptide ions were automatically selected for subsequent MS/MS (MS2) analysis with a minimum intensity threshold of  $2.5 \times 10^4$  and a 30 s dynamic exclusion time. MS2 spectra were acquired in the Orbitrap analyzer with the following settings: quadrupole isolation window 1.2 Th, AGC target  $1.25 \times 10^4$ , maximum injection time 120 ms, fragmentation type HCD, normalized collision energy 38%, nominal resolution 50,000, fixed first m/z 110. The number of MS2 spectra acquired per each MS1 spectrum was determined by setting the maximum cycle time for MS1 and MS2 spectra to 3 s (using a top speed mode).

In the MS3 approach, we employed a synchronous precursor selection (SPS) MS3 method in a data-dependent mode. The scan sequence commenced with the acquisition of a full MS spectrum using the Orbitrap analyzer, with m/z range from 375 to 1500, nominal resolution 120,000, AGC target  $4 \times 10^5$ , and maximum injection time of 50 ms. The most abundant peptide ions detected in the full MS spectrum were then selected for MS2 and MS3 analysis, with maximum cycle time set to 5 s (using a top speed mode). MS2 scans were performed in the linear ion trap with quadrupole isolation window 0.7 Th, AGC target  $1 \times 10^4$ , maximum injection time 35 ms, fragmentation type

CID, and normalized collision energy 30%. Following the acquisition of each MS2 spectrum, synchronous precursor selection isolated up to 10 most abundant fragment ions with an isolation window 3.0 Th for subsequent MS3 analysis. These fragment ions underwent further fragmentation by HCD with normalized collision energy 55%. Finally, the MS3 spectrum was acquired in the Orbitrap analyzer with a nominal resolution 50,000, AGC target  $1 \times 10^5$ , maximum injection time of 120 ms, and m/z range 110-500.

### **Data processing**

The raw LC-MS/MS data were analysed by MaxQuant, version 2.2.0.0. The Andromeda search engine was employed to perform MS/MS data matching against the UniProt Human proteome database (version UP000005640\_9606, 20607 human sequences). Enzyme specificity was trypsin, with maximum two missed cleavages permitted. When needed, semi-tryptic option was specified for the identification of semi-tryptic peptides in the MS2 dataset. Cysteine carbamidomethylation was set as a fixed modification, while methionine oxidation, N-terminal acetylation, asparagine or glutamine deamidation were used as a variable modification. A false discovery rate (1%) was used as a filter at both protein and peptide levels. Default settings were employed for all other parameters. Peptide quantification was executed using TMTpro 16plex.

The post-MaxQuant data analysis was the following. The TMT reporter ion abundances for each sample and replicate were normalized by the sum of these abundances. Then for each peptide we calculated the abundance ratio B/A for the two parts of each diagonally-cut gel. The protein B/A values were obtained using the median of the B/A ratios of the peptides associated with a given protein. Following this, we calculated the coefficient of variation (CV) of the B/A ratios between the four replicates of DMSO treatments.

To convert the protein B/A values into MW, we established calibration curves for each gel lane using the proteins chosen as described in the main text. Utilizing the lane-specific calibration curves, we computed the protein MW values for all four replicates of the DMSO/STS-treatment and determined the distribution of the MW errors (deviations from the calibration curve), as well as its parameters, such as the centroid and full width at half maximum (FWHM).

After converting B/A values of all identified proteins to MW using calibration curves, volcano plots were generated by calculating the MW fold change (FC) between STS and DMSO treatments and conducting Student's

t-tests for the two treatment groups. The p-value adjustment was following the Benjamini and Hochberg method, employed for multiple hypothesis adjustment <sup>1</sup>: the peptides were ranked in descending order according to the number of peptides attributed to each protein, and p-values were subsequently adjusted by multiplying by their respective ranks. Given the follow-up validation, false discovery rate (FDR) of  $\leq 10\%$  was determined to be acceptable for proteins with significant MW shifts (FDR was defined as the number of proteins with significant MW increase divided by the total number of proteins with both significant MW increase and decrease).

### **Data availability**

The data supporting the findings of this study are available in the supplementary information files. The mass spectrometry data have been deposited in the ProteomeXchange Consortium via the PRIDE partner repository (<https://www.ebi.ac.uk/pride/>) with the dataset identifiers PXD049007.

### **REFERENCES**

- 1 Diz, A. P., Carvajal-Rodríguez, A. & Skibinski, D. O. Multiple hypothesis testing in proteomics: a strategy for experimental work. *Mol. Cell. Proteomics* 10, M110.004374, doi:10.1074/mcp.M110.004374 (2011).
